# Supplementary material for: An Oligopeptide Transporter of Mycobacterium tuberculosis Regulates Cytokine Release and Apoptosis of Infected Macrophages
Source: PubMed Central journal article supplement (PMC2923189; doi:10.1371/journal.pone.0012225), 2010-08-17
Supplement: pone.0012225.s001.pdf [file pone.0012225.s001.pdf]

**Table S1.****Primers for amplification of derivatives of OppA<sub>MTB</sub>**

| Primers for OppA derivatives    |                                 |          |
|---------------------------------|---------------------------------|----------|
| Primer b                        | Primer c                        | Mutation |
| 5'- AACATCTTGCACGACGACGGCAAC-3' | 5'-GTTGCCGTCGTCGTGCAAGATGTT -3' | I 107S   |
| 5'-TTGCACATCGCCGGCAACAAC-3'     | 5'-GTTGTTGCCGGCGATGTGCAA-3'     | D108A    |
| 5'-TTGCAATCGACAGCAACAACGCC -3'  | 5'-GGCGTTGTTGCTGTCGATGTGCAA -3' | G109S    |
| 5'-ATCGACGGCGCCAACGCCGAG-3'     | 5'-CTCGGCGTTGGCGCCGTCGAT-3'     | N110A    |
| 5'-AACAACGCCGAGGACGCGGGCGATG-3' | 5'-CATCGCCGCGTCCTCGGCGTTGTT -3' | V114D    |
| 5'- AACGCCGAGGTCGAGGCGATGATG-3' | 5'-CATCATCGCCTCGACCTCGGCGTT -3' | A115D    |
| 5'-GAGTGGCGCGGTAAGTTCGCGGGC-3'  | 5'-GCCCCGGAACCTACCGCGCCACTC-3'  | M226N    |
| 5'-TTCGCGGGCAACTACATGCTGCTG-3'  | 5'-CAGCAGCATGTAGTTGCCCGCAA -3'  | G231Y    |
| 5'-ATCGCTTCTGGCAGCGGGGCC-3'     | 5'-GGCGCCGCTGCCAGAAGCGAT-3'     | S194G    |
| 5'-GCCCAATACGCCCTCACCAGC-3'     | 5'-GCTGGTGAGGGCGTAAACCCG-3'     | G377R    |
| 5'-GACATCGCAGCGTTCGGCTGG-3'     | 5'-CCAGCCGAACGCTGCGATGTC-3'     | Q488A    |
| 5'-GCACAGTTCGGCTCGGTGGGCGAC -3' | 5'-GTCGCCCACCGAGCCGAACTGTGC -3' | W491S    |
| 5'-TGGGTGGGCAACCGTTTTCCG-3'     | 5'-CGGAAACGCGTTGCCACCCA-3'      | D494N    |
| 5'-GTGGGCGACGCGTTCCGCTGTCA-3'   | 5'- TGACAGCGGAACCGCGTCGCCAC-3'  | F496D    |

“a” 5'-TTTCTAGAC**CATATGG**GCTGACCGTGGCCAG-3' ( NdeI site in bold)

“d” 5'-TATA**AGCTT**CAGCGTCGCATGAACCC-3' ( HindIII site in bold)
