# Supplementary material for: An Oligopeptide Transporter of Mycobacterium tuberculosis Regulates Cytokine Release and Apoptosis of Infected Macrophages
Source: PubMed Central journal article supplement (PMC2923189; doi:10.1371/journal.pone.0012225), 2010-08-17
Supplement: pone.0012225.s002.pdf [file pone.0012225.s002.pdf]

|       |     |                                                                                                                                                  |     |
|-------|-----|--------------------------------------------------------------------------------------------------------------------------------------------------|-----|
| Mtb   | 45  | VAMVLTGCSASGTQLELAPTADRRRAAVGTTSDINQQDPATLQDGGNLRLLSLTDFPPNFNI                                                                                   | 104 |
| Msmeg | 24  | V M +T C++ + P+A A VG T+DIN QD A L+ GGNLRL+L FP NFN<br>VTMAMTSCTS DERDI---PSAGGTAEVGATNDINPQDVANLRQGGNLRLLALPGFPSNFNT                            | 80  |
| Mtb   | 105 | LHIDGNNAEVAAMMKATLPRAFIIGPDGSTTVDTNYFTSIELTRTAPQVVVYTYINPEAVW                                                                                    | 164 |
| Msmeg | 81  | LHIDGN A + +M+ATLPRA+ +GPDGSTTV+T+YFTS+ELT T PQVVVYTYINPEAVW<br>LHIDGNEASLGGLMRATLPRA YRVGPDGSTTVNTDYFTSVELTSTDPQVVVYTYINPEAVW                   | 140 |
| Mtb   | 165 | SDGTPITWRDIASQIHAISGADKA FEIASSSGAERVASVTRGVDDRQAVVTFAPYAEWR                                                                                     | 224 |
| Msmeg | 141 | +DGTPI TW DIA+QIHA SG DKAF+IAS +G++RVASVTRGVDDRQAVVTF A+P++EW+<br>TDGTPITWEDIAAQI HATSGKDKAFQIASLNGSDRVASVTRGVDDRQAVVTF AEPFSEWQ                 | 200 |
| Mtb   | 225 | GMFAGNGMLLPASMTATPEAFNKGQLDGP GSAGPFVVSALDRTAQRIVLTRNPRWWGAR                                                                                     | 284 |
| Msmeg | 201 | GMFAGN MLLP S T+ PE FNKGQL+GPGPSAGPF+VS +DR AQRI LTRNP+WWG<br>GMFAGNTMLPKSSTS DPEVFNKQLNGP GSAGPFMVSNVDRGAQRITLTRNPKWWGEP                        | 260 |
| Mtb   | 285 | PRLDSITYLVLDDAARLPALQNN TIDATGVGTLDQLTIAARTKGISIRRAPGSPWYHFTL                                                                                    | 344 |
| Msmeg | 261 | P LDSITY VLDDAAR+PALQNN +DATGV +LD+L IA RT GLSIRRAP PSWYHFT<br>PVLDSITYTVLDDAARIPALQNNALDATGVASLDELEIARRTPGISIRRAPSPWYHFTF                       | 320 |
| Mtb   | 345 | NGAPGSILADKALRLAI AKGIDRYTIARVAQYGLTSDPVPLNNHVFVAGQDGYQDN SGVV                                                                                   | 404 |
| Msmeg | 321 | NGAPGSILADKALR A+AKGIDR I VAQ GL DP PLNNH+FVAGQ+GYQDNS VV<br>NGAPGSILADKALRQAVAKGIDRNIITTV AQRLADDPKPLNNHIFVAGQEGYQDNSEVV                        | 380 |
| Mtb   | 405 | AYNPEQAKRELDALGWR-RSGA-FREK DGRQLVIRDLFYDAQSTRQFAQIAQHTLAQIGV                                                                                    | 462 |
| Msmeg | 381 | A++PE+AK ELDALGW + GA FREKDG++L IRD+ YD+QSTRQ A IAQ++LAQIGV<br>AFDPEKAKAELDALGWTLPKGAQFREKDGKRLTIRDLVLYDSQSTRQIATIAQNSLAQIGV                     | 440 |
| Mtb   | 463 | KLELQAKSGSGFFSDYVNVGAFDIAQFGWVGDAFPLSSLTQIYASDGESNFGKIGSPQID                                                                                     | 522 |
| Msmeg | 441 | +L ++AK GSGFF+D++ G F D I A Q F W V G D A F L L Q I Y + D + S N F G + I S P ++ D<br>ELRIEAKPGSGFFTDWIIPGNFDIAQFSWVGDAFSLCCLNQIYTTDADSNFGRISSPEVD | 500 |
| Mtb   | 523 | AAIERTLAELDPGKARALANQVDELIWAEGFSLPLTQSPGTAVRSTLANFGATGLADLD                                                                                      | 582 |
| Msmeg | 501 | T+ ELDP KAR +AN++D+LIW E FSLPL QSPG VAVRS LAN+G G+ D+D<br>TKAIATMGELDPEKARTMANELDKLIWEEVFS LPLFQSPGNVAVRSNLANYGPAGIGDID                          | 560 |
| Mtb   | 583 | YTAIGFMR 590                                                                                                                                     |     |
| Msmeg | 561 | T +GFM+<br>ITKVGFMK 568                                                                                                                          |     |
