# Supplementary material for: An Oligopeptide Transporter of Mycobacterium tuberculosis Regulates Cytokine Release and Apoptosis of Infected Macrophages
Source: PubMed Central journal article supplement (PMC2923189; doi:10.1371/journal.pone.0012225), 2010-08-17

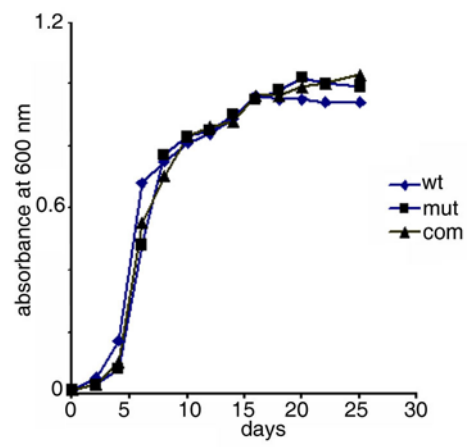

Supplement: pone.0012225.s004.pdf [file pone.0012225.s004.pdf]
